# Supplementary material for: Efficacy of Percutaneous Adhesiolysis in Managing Low Back and Lower Extremity Pain: A Systematic Review and Meta-analysis of Randomized Controlled Trials
Source: Springer Nature journal article supplement (doi:10.1007/s40122-023-00508-y), 2023-05-25
Supplement: MOESM1 [file 25405036]

# **Efficacy of Percutaneous Adhesiolysis in Managing Low Back and Lower Extremity Pain: A Systematic Review and Meta-Analysis of Randomized Controlled Trials**

Laxmaiah Manchikanti<sup>1\*</sup>, Nebojsa Nick Knezevic<sup>2</sup>, Emilija Knezevic<sup>3</sup>, Rachana Pasupuleti<sup>4</sup>, Alan D. Kaye<sup>5</sup>,  
Mahendra R. Sanapati<sup>6</sup>, Joshua A. Hirsch<sup>7</sup>

<sup>1,6</sup>Pain Management Centers of America, Paducah, KY & Evansville, IN, USA

<sup>2</sup>Advocate Illinois Masonic Medical Center and College of Medicine, University of Illinois, Chicago, IL, USA

<sup>3</sup>University of Illinois at Urbana-Champaign, College of Liberal Arts and Sciences, Champaign, IL, USA

<sup>4</sup>University of Kentucky, Lexington, KY, USA

<sup>5</sup>LSU Health Sciences Center, Shreveport, Ochsner Shreveport Hospital and Interventional Pain Clinic Feist-Wieller Cancer Center, Shreveport, LA, USA

<sup>7</sup>Massachusetts General Hospital and Harvard Medical School, Boston, MA, USA

**\*Correspondence to:** Laxmaiah Manchikanti, MD, 67 Lakeview Drive, Paducah, Kentucky 42001, E-mail: [drilm@thepainmd.com](mailto:drilm@thepainmd.com)

**Table S1.** Sources of risk of bias and Cochrane Review rating system.

| Bias Domain | Source of Bias                                                                              |                                                                                                                                                                                                                                                                                                                                                                                                                                                                     | Possible Answers |
|-------------|---------------------------------------------------------------------------------------------|---------------------------------------------------------------------------------------------------------------------------------------------------------------------------------------------------------------------------------------------------------------------------------------------------------------------------------------------------------------------------------------------------------------------------------------------------------------------|------------------|
| Selection   | (1) Was the method of randomization adequate?                                               | A random (unpredictable) assignment sequence. Examples of adequate methods are coin toss (for studies with 2 groups), rolling a dice (for studies with 2 or more groups), drawing of balls of different colors, drawing of ballots with the study group labels from a dark bag, computer-generated random sequence, preordered sealed envelopes, sequentially-ordered vials, telephone call to a central office, and preordered list of treatment assignments.      | Yes/No/Unsure    |
|             |                                                                                             | Examples of inadequate methods are: alternation, birth date, social insurance/security number, date in which they are invited to participate in the study, and hospital registration number.                                                                                                                                                                                                                                                                        |                  |
| Selection   | (2) Was the treatment allocation concealed?                                                 | Assignment generated by an independent person not responsible for determining the eligibility of the patients. This person has no information about the persons included in the trial and has no influence on the assignment sequence or on the decision about eligibility of the patient.                                                                                                                                                                          | Yes/No/Unsure    |
| Performance | (3) Was the patient blinded to the intervention?                                            | Index and control groups are indistinguishable for the patients or if the success of blinding was tested among the patients and it was successful.                                                                                                                                                                                                                                                                                                                  | Yes/No/Unsure    |
| Performance | (4) Was the care provider blinded to the intervention?                                      | Index and control groups are indistinguishable for the care providers or if the success of blinding was tested among the care providers and it was successful.                                                                                                                                                                                                                                                                                                      | Yes/No/Unsure    |
| Detection   | (5) Was the outcome assessor blinded to the intervention?                                   | Adequacy of blinding should be assessed for each primary outcome separately. This item should be scored "yes" if the success of blinding was tested among the outcome assessors and it was successful or:                                                                                                                                                                                                                                                           | Yes/No/Unsure    |
|             |                                                                                             | <ul style="list-style-type: none"> <li>for patient-reported outcomes in which the patient is the outcome assessor (e.g., pain, disability): the blinding procedure is adequate for outcome assessors if participant blinding is scored "yes"</li> </ul>                                                                                                                                                                                                             |                  |
|             |                                                                                             | <ul style="list-style-type: none"> <li>for outcome criteria assessed during scheduled visit and that supposes a contact between participants and outcome assessors (e.g., clinical examination): the blinding procedure is adequate if patients are blinded, and the treatment or adverse effects of the treatment cannot be noticed during clinical examination</li> </ul>                                                                                         |                  |
|             |                                                                                             | <ul style="list-style-type: none"> <li>for outcome criteria that do not suppose a contact with participants (e.g., radiography, magnetic resonance imaging): the blinding procedure is adequate if the treatment or adverse effects of the treatment cannot be noticed when assessing the main outcome</li> </ul>                                                                                                                                                   |                  |
|             |                                                                                             | <ul style="list-style-type: none"> <li>for outcome criteria that are clinical or therapeutic events that will be determined by the interaction between patients and care providers (e.g., cointerventions, hospitalization length, treatment failure), in which the care provider is the outcome assessor: the blinding procedure is adequate for outcome assessors if item "4" (caregivers) is scored "yes"</li> </ul>                                             |                  |
|             |                                                                                             | <ul style="list-style-type: none"> <li>for outcome criteria that are assessed from data of the medical forms: the blinding procedure is adequate if the treatment or adverse effects of the treatment cannot be noticed on the extracted data</li> </ul>                                                                                                                                                                                                            |                  |
| Attrition   | (6) Was the drop-out rate described and acceptable?                                         | The number of participants who were included in the study but did not complete the observation period or were not included in the analysis must be described and reasons given. If the percentage of withdrawals and drop-outs does not exceed 20% for short-term follow-up and 30% for long-term follow-up and does not lead to substantial bias a "yes" is scored. (N.B. these percentages are arbitrary, not supported by literature).                           | Yes/No/Unsure    |
| Attrition   | (7) Were all randomized participants analyzed in the group to which they were allocated?    | All randomized patients are reported/analyzed in the group they were allocated to by randomization for the most important moments of effect measurement (minus missing values) irrespective of noncompliance and cointerventions.                                                                                                                                                                                                                                   | Yes/No/Unsure    |
| Reporting   | (8) Are reports of the study free of suggestion of selective outcome reporting?             | All the results from all prespecified outcomes have been adequately reported in the published report of the trial. This information is either obtained by comparing the protocol and the report, or in the absence of the protocol, assessing that the published report includes enough information to make this judgment.                                                                                                                                          | Yes/No/Unsure    |
| Selection   | (9) Were the groups similar at baseline regarding the most important prognostic indicators? | Groups have to be similar at baseline regarding demographic factors, duration and severity of complaints, percentage of patients with neurological symptoms, and value of main outcome measure(s).                                                                                                                                                                                                                                                                  | Yes/No/Unsure    |
| Performance | (10) Were cointerventions avoided or similar?                                               | If there were no cointerventions or they were similar between the index and control groups.                                                                                                                                                                                                                                                                                                                                                                         | Yes/No/Unsure    |
| Performance | (11) Was the compliance acceptable in all groups?                                           | The reviewer determines if the compliance with the interventions is acceptable, based on the reported intensity, duration, number and frequency of sessions for both the index intervention and control intervention(s). For example, physiotherapy treatment is usually administered for several sessions; therefore it is necessary to assess how many sessions each patient attended. For single-session interventions (e.g., surgery), this item is irrelevant. | Yes/No/Unsure    |

|           |                                                                      |                                                                                                                                                                                                                                                                                                                                                                                                                                                                                                                                                                                                                                                                                                                  |               |
|-----------|----------------------------------------------------------------------|------------------------------------------------------------------------------------------------------------------------------------------------------------------------------------------------------------------------------------------------------------------------------------------------------------------------------------------------------------------------------------------------------------------------------------------------------------------------------------------------------------------------------------------------------------------------------------------------------------------------------------------------------------------------------------------------------------------|---------------|
| Detection | (12) Was the timing of the outcome assessment similar in all groups? | Timing of outcome assessment should be identical for all intervention groups and for all primary outcome measures.                                                                                                                                                                                                                                                                                                                                                                                                                                                                                                                                                                                               | Yes/No/Unsure |
| Other     | (13) Are other sources of potential bias unlikely?                   | <p>Other types of biases. For example:</p> <ul style="list-style-type: none"> <li>• When the outcome measures were not valid. There should be evidence from a previous or present scientific study that the primary outcome can be considered valid in the context of the present.</li> <li>• Industry-sponsored trials. The conflict of interest (COI) statement should explicitly state that the researchers have had full possession of the trial process from planning to reporting without funders with potential COI having any possibility to interfere in the process. If, for example, the statistical analyses have been done by a funder with a potential COI, usually “unsure” is scored.</li> </ul> | Yes/No/Unsure |

**Source:** Furlan AD, et al; Editorial Board of the Cochrane Back, Neck Group. 2015 Updated Method Guideline for Systematic Reviews in the Cochrane Back and Neck Group. Spine (Phila Pa 1976). 2015; 40:1660-73 [45].

**Table S2.** Item checklist for assessment of randomized controlled trials of IPM techniques utilizing IPM – QRB.

|             |                                                                                                                                                                             | Scoring |
|-------------|-----------------------------------------------------------------------------------------------------------------------------------------------------------------------------|---------|
| <b>I.</b>   | <b>TRIAL DESIGN AND GUIDANCE REPORTING</b>                                                                                                                                  |         |
| <b>1.</b>   | <b>CONSORT or SPIRIT</b>                                                                                                                                                    |         |
|             | Trial designed and reported without any guidance                                                                                                                            | 0       |
|             | Trial designed and reported utilizing minimum criteria other than CONSORT or SPIRIT criteria or trial was conducted prior to 2005                                           | 1       |
|             | Trial implies it was based on CONSORT or SPIRIT without clear description with moderately significant criteria for randomized trials or the trial was conducted before 2005 | 2       |
|             | Explicit use of CONSORT or SPIRIT with identification of criteria or trial conducted with high level reporting and criteria or conducted before 2005                        | 3       |
| <b>II.</b>  | <b>DESIGN FACTORS</b>                                                                                                                                                       |         |
| <b>2.</b>   | <b>Type and Design of Trial</b>                                                                                                                                             |         |
|             | Poorly designed control group (quasi selection, convenient sampling)                                                                                                        | 0       |
|             | Proper active-control or sham procedure with injection of active agent                                                                                                      | 2       |
|             | Proper placebo control (no active solutions into active structures)                                                                                                         | 3       |
| <b>3.</b>   | <b>Setting/Physician</b>                                                                                                                                                    |         |
|             | General setting with no specialty affiliation and general physician                                                                                                         | 0       |
|             | Specialty of anesthesia/PMR/neurology/radiology/ortho, etc.                                                                                                                 | 1       |
|             | Interventional pain management with interventional pain management physician                                                                                                | 2       |
| <b>4.</b>   | <b>Imaging</b>                                                                                                                                                              |         |
|             | Blind procedures                                                                                                                                                            | 0       |
|             | Ultrasound                                                                                                                                                                  | 1       |
|             | CT                                                                                                                                                                          | 2       |
|             | Fluoro                                                                                                                                                                      | 3       |
| <b>5.</b>   | <b>Sample Size</b>                                                                                                                                                          |         |
|             | Less than 50 participants in the study without appropriate sample size determination                                                                                        | 0       |
|             | Sample size calculation with less than 25 patients in each group                                                                                                            | 1       |
|             | Appropriate sample size calculation with at least 25 patients in each group                                                                                                 | 2       |
|             | Appropriate sample size calculation with 50 patients in each group                                                                                                          | 3       |
| <b>6.</b>   | <b>Statistical Methodology</b>                                                                                                                                              |         |
|             | None or inappropriate                                                                                                                                                       | 0       |
|             | Appropriate                                                                                                                                                                 | 1       |
| <b>III.</b> | <b>PATIENT FACTORS</b>                                                                                                                                                      |         |
| <b>7.</b>   | <b>Inclusiveness of Population</b>                                                                                                                                          |         |
| <b>7a.</b>  | For epidural procedures:                                                                                                                                                    |         |
|             | Poorly identified mixed population                                                                                                                                          | 0       |
|             | Clearly identified mixed population                                                                                                                                         | 1       |
|             | Disorders specific trials (i.e. well defined spinal stenosis and disc herniation, disorder specific, disc herniation or spinal stenosis or post-surgery syndrome)           | 2       |
| <b>7b.</b>  | For facet or sacroiliac joint interventions:                                                                                                                                |         |
|             | No diagnostic blocks                                                                                                                                                        | 0       |
|             | Selection with single diagnostic blocks                                                                                                                                     | 1       |
|             | Selection with placebo or dual diagnostic blocks                                                                                                                            | 2       |
| <b>8.</b>   | <b>Duration of Pain</b>                                                                                                                                                     |         |
|             | Less than 3 months                                                                                                                                                          | 0       |
|             | 3 to 6 months                                                                                                                                                               | 1       |
|             | > 6 months                                                                                                                                                                  | 2       |
| <b>9.</b>   | <b>Previous Treatments</b>                                                                                                                                                  |         |
|             | Conservative management including drug therapy, exercise therapy, physical therapy, etc.                                                                                    |         |
|             | Were not utilized                                                                                                                                                           | 0       |
|             | Were utilized sporadically in some patients                                                                                                                                 | 1       |
|             | Were utilized in all patients                                                                                                                                               | 2       |
| <b>10.</b>  | <b>Duration of Follow-up with Appropriate Interventions</b>                                                                                                                 |         |
|             | Less than 3 months or 12 weeks for epidural or facet joint procedures, etc. and 6 months for intradiscal procedures and implantables                                        | 0       |
|             | 3 to 6 months for epidural or facet joint procedures, etc., or 1 year for intradiscal procedures or implantables                                                            | 1       |
|             | 6 months to 17 months for epidurals or facet joint procedures, etc., and 2 years or longer for discal procedures and implantables                                           | 2       |
|             | 18 months or longer for epidurals and facet joint procedures, etc., or 5 years or longer for discal procedures and implantables                                             | 3       |
| <b>IV.</b>  | <b>OUTCOMES</b>                                                                                                                                                             |         |
| <b>11.</b>  | <b>Outcomes Assessment Criteria for Significant Improvement</b>                                                                                                             |         |
|             | No descriptions of outcomes<br>OR<br>< 20% change in pain rating or functional status                                                                                       | 0       |
|             | Pain rating with a decrease of 2 or more points or more than 20% reduction<br>OR<br>functional status improvement of more than 20%                                          | 1       |

|              |                                                                                                                                                                                                                                                            | <b>Scoring</b> |
|--------------|------------------------------------------------------------------------------------------------------------------------------------------------------------------------------------------------------------------------------------------------------------|----------------|
|              | Pain rating with decrease of $\geq 2$ points<br>AND<br>$\geq 20\%$ change or functional status improvement of $\geq 20\%$                                                                                                                                  | 2              |
|              | Pain rating with a decrease of 3 or more points or more than 50% reduction<br>OR<br>functional status improvement with a 50% or 40% reduction in disability score                                                                                          | 2              |
|              | Significant improvement with pain and function $\geq 50\%$ or 3 points and 40% reduction in disability scores                                                                                                                                              | 4              |
| <b>12.</b>   | <b>Analysis of all Randomized Participants in the Groups</b>                                                                                                                                                                                               |                |
|              | Not performed                                                                                                                                                                                                                                              | 0              |
|              | Performed without intent-to-treat analysis without inclusion of all randomized participants                                                                                                                                                                | 1              |
|              | All participants included with or without intent-to-treat analysis                                                                                                                                                                                         | 2              |
| <b>13.</b>   | <b>Description of Drop Out Rate</b>                                                                                                                                                                                                                        |                |
|              | No description of dropouts, despite reporting of incomplete data or $\geq 20\%$ withdrawal                                                                                                                                                                 | 0              |
|              | Less than 20% withdrawal in one year in any group                                                                                                                                                                                                          | 1              |
|              | Less than 30% withdrawal at 2 years in any group                                                                                                                                                                                                           | 2              |
| <b>14.</b>   | <b>Similarity of Groups at Baseline for Important Prognostic Indicators</b>                                                                                                                                                                                |                |
|              | Groups dissimilar with significant influence on outcomes with or without appropriate randomization and allocation                                                                                                                                          | 0              |
|              | Groups dissimilar without influence on outcomes despite appropriate randomization and allocation                                                                                                                                                           | 1              |
|              | Groups similar with appropriate randomization and allocation                                                                                                                                                                                               | 2              |
| <b>15.</b>   | <b>Role of Co-Interventions</b>                                                                                                                                                                                                                            |                |
|              | Co-interventions were provided but were not similar in the majority of participants                                                                                                                                                                        | 0              |
|              | No co-interventions or similar co-interventions were provided in the majority of the participants                                                                                                                                                          | 1              |
| <b>V.</b>    | <b>RANDOMIZATION</b>                                                                                                                                                                                                                                       |                |
| <b>16.</b>   | <b>Method of Randomization</b>                                                                                                                                                                                                                             |                |
|              | Quasi randomized or poorly randomized or not described                                                                                                                                                                                                     | 0              |
|              | Adequate randomization (coin toss, drawing of balls of different colors, drawing of ballots)                                                                                                                                                               | 1              |
|              | High quality randomization (Computer generated random sequence, pre-ordered sealed envelopes, sequentially ordered vials, telephone call, pre-ordered list of treatment assignments, etc.)                                                                 | 2              |
| <b>VI.</b>   | <b>ALLOCATION CONCEALMENT</b>                                                                                                                                                                                                                              |                |
| <b>17.</b>   | <b>Concealed Treatment Allocation</b>                                                                                                                                                                                                                      |                |
|              | Poor concealment of allocation (open enrollment) or inadequate description of concealment                                                                                                                                                                  | 0              |
|              | Concealment of allocation with borderline or good description of the process with probability of failure of concealment                                                                                                                                    | 1              |
|              | High quality concealment with strict controls (independent assignment without influence on the assignment sequence)                                                                                                                                        | 2              |
| <b>VII.</b>  | <b>BLINDING</b>                                                                                                                                                                                                                                            |                |
| <b>18.</b>   | <b>Patient Blinding</b>                                                                                                                                                                                                                                    |                |
|              | Patients not blinded                                                                                                                                                                                                                                       | 0              |
|              | Patients blinded adequately                                                                                                                                                                                                                                | 1              |
| <b>19.</b>   | <b>Care Provider Blinding</b>                                                                                                                                                                                                                              |                |
|              | Care provider not blinded                                                                                                                                                                                                                                  | 0              |
|              | Care provider blinded adequately                                                                                                                                                                                                                           | 1              |
| <b>20.</b>   | <b>Outcome Assessor Blinding</b>                                                                                                                                                                                                                           |                |
|              | Outcome assessor not blinded or was able to identify the groups                                                                                                                                                                                            | 0              |
|              | Performed by a blinded independent assessor with inability to identify the assignment-based provider intervention (i.e., subcutaneous injection, intramuscular distant injection, difference in preparation or equipment use, numbness and weakness, etc.) | 1              |
| <b>VIII.</b> | <b>CONFLICTS OF INTEREST</b>                                                                                                                                                                                                                               |                |
| <b>21.</b>   | <b>Funding and Sponsorship</b>                                                                                                                                                                                                                             |                |
|              | Trial included industry employees                                                                                                                                                                                                                          | -3             |
|              | Industry employees involved; high levels of funding with remunerations by industry or an organization funded with conflicts                                                                                                                                | -3             |
|              | Industry or organizational funding with reimbursement of expenses with some involvement                                                                                                                                                                    | 0              |
|              | Industry or organization funding of expenses without involvement                                                                                                                                                                                           | 1              |
|              | Funding by internal resources only with supporting entity unrelated to industry                                                                                                                                                                            | 2              |
|              | Governmental funding without conflict such as NIH, NHS, AHRQ                                                                                                                                                                                               | 3              |
| <b>22.</b>   | <b>Conflicts of Interest</b>                                                                                                                                                                                                                               |                |
|              | None disclosed with potential implied conflict                                                                                                                                                                                                             | 0              |
|              | Marginally disclosed with potential conflict                                                                                                                                                                                                               | 1              |
|              | Well disclosed with minor conflicts                                                                                                                                                                                                                        | 2              |
|              | Well disclosed with no conflicts                                                                                                                                                                                                                           | 3              |
|              | Hidden conflicts with poor disclosure                                                                                                                                                                                                                      | -1             |
|              | Misleading disclosure with conflicts                                                                                                                                                                                                                       | -2             |
|              | Major impact related to conflicts                                                                                                                                                                                                                          | -3             |
| <b>TOTAL</b> |                                                                                                                                                                                                                                                            | <b>48</b>      |

**Source:** Manchikanti L, et al. Assessment of methodologic quality of randomized trials of interventional techniques: Development of an interventional pain management specific instrument. Pain Physician. 2014; 17:E263-E90 [46].
